# Supplementary material for: Diagnosis and classification of portosystemic shunts: a machine learning retrospective case-control study
Source: Front Vet Sci. 2024 Apr 4;11:1291318. doi: 10.3389/fvets.2024.1291318 (PMC11024426; doi:10.3389/fvets.2024.1291318)
Supplement: Supplementary file 1 [file Table_1.XLSX]

## Sheet: Sheet1
		MLM
		PSS	PSS SubCat
Hyperparameters	n estimators	100	115
	learning rate	0.08	0.4
	gamma	0.1	0
	reg_lambda	3.2	12.8
	reg_alpha	3.2	0.1
	max depth	5	9
	objective	binary:logistic	multi:softmax
	booster	gbtree	gbtree
	grow policy	lossguide	lossguide
